# Supplementary material
Source: HighWire-hosted journal article supplement (https://erj.ersjournals.com/content/54/4/1900938)
Supplement: inline-supplementary-material-1 [file inline-supplementary-material-1.pdf]

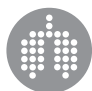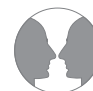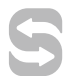

SHAREABLE PDF

# Generalised mosaicism for *TSC2* mutation in isolated lymphangioleiomyomatosis

Barbara Ogórek<sup>1</sup>, Lana Hamieh<sup>1</sup>, Kathryn Lasseter<sup>1</sup>, Shefali Bagwe<sup>1</sup>, Tania Machado<sup>2</sup>, Carmen Herranz-Ors<sup>3</sup>, Aaron R. Thorner<sup>4</sup>, Anwasha Nag<sup>4</sup>, Peter Gulleman<sup>5</sup>, Krinio Giannikou<sup>1</sup>, Lisa R. Young<sup>5</sup>, Miquel Àngel Pujana<sup>3</sup>, Thomas N. Darling<sup>6</sup>, Souheil El-Chemaly<sup>1</sup>, Joel Moss<sup>2</sup>, Elizabeth P. Henske<sup>1</sup> and David J. Kwiatkowski<sup>1</sup>

**Affiliations:** <sup>1</sup>Dept of Medicine, Brigham and Women's Hospital, Boston, MA, USA. <sup>2</sup>Pulmonary Branch, National Heart, Lung, and Blood Institute (NHLBI), Bethesda, MD, USA. <sup>3</sup>ProCURE, Catalan Institute of Oncology (ICO), Bellvitge Institute of Biomedical Research (IDIBELL), Barcelona, Spain. <sup>4</sup>Center for Cancer Genome Discovery, Dana-Farber Cancer Institute, Boston, MA, USA. <sup>5</sup>Division of Pediatric Pulmonary Medicine, Dept of Pediatrics, Vanderbilt University School of Medicine, Nashville, TN, USA. <sup>6</sup>Dept of Dermatology, Uniformed Services University of the Health Sciences, Bethesda, MD, USA.

**Correspondence:** David J. Kwiatkowski, Division of Pulmonary and Critical Care Medicine and Genetics, Dept of Medicine, Brigham and Women's Hospital, 20 Shattuck Street Thorn 826, Boston, MA 02115, USA. E-mail: dk@rics.bwh.harvard.edu

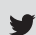

@ERSpublications

**Analysis of plasma cell-free DNA from 61 sporadic lymphangioleiomyomatosis (LAM) patients identified generalised mosaicism for a *TSC2* mutation in one, suggesting that some sporadic LAM patients are occult generalised mosaics for *TSC2* mutations** <http://bit.ly/2yLr0Ls>

**Cite this article as:** Ogórek B, Hamieh L, Lasseter K, *et al.* Generalised mosaicism for *TSC2* mutation in isolated lymphangioleiomyomatosis. *Eur Respir J* 2019; 54: 1900938 [<https://doi.org/10.1183/13993003.00938-2019>].

This single-page version can be shared freely online.

## To the Editor:

Lymphangioleiomyomatosis (LAM) is a rare, slowly progressive pulmonary disease causing cystic lung destruction and respiratory failure. It affects predominantly premenopausal women, and rarely men. It can occur as a sporadic condition (sporadic LAM) or in association with tuberous sclerosis complex (TSC) [1]. LAM is caused by biallelic inactivation of the tumour suppressor gene *TSC2* in LAM cells, which leads to hyperactivation of mammalian target of rapamycin complex (mTORC)1, resulting in anabolism and LAM cell proliferation [2]. Sirolimus and everolimus, mTORC1 allosteric inhibitors, have been shown to retard progression of LAM [3].
